# Supplementary material
Source: PubMed Central journal article supplement (PMC3579144)
Supplement: emboj20133s1.pdf [file emboj20133s1.pdf]

Supplemental Figure 1

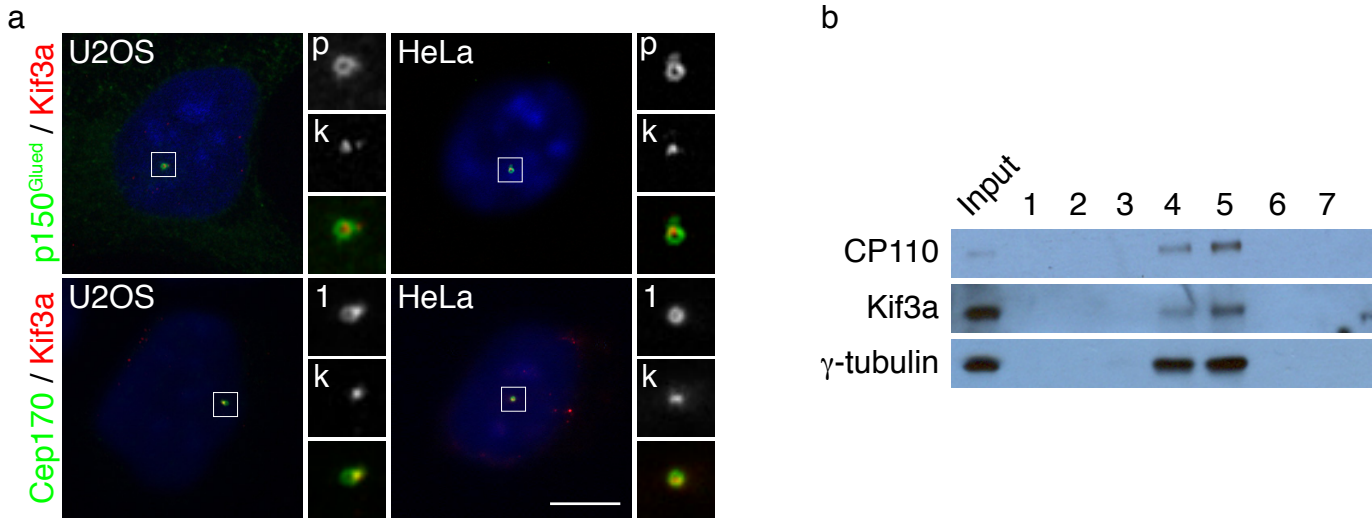

**Supplemental Figure 1: Kif3a localizes to the subdistal appendage in human cells.** a) The human epithelial cell lines U2OS and HeLa were co-stained for Kif3a (“k”, red), and the subdistal appendage proteins, p150<sup>Glued</sup> and Cep170 (“p” and “1”, green). Scale bars indicate 5 $\mu$ m for all images. b) Jurkat cell lysates were fractionated on a discontinuous sucrose gradient to enrich for centrosomes. The collected fractions were analyzed by immunoblot for CP110, Kif3a and  $\gamma$ -tubulin.

Supplemental Figure 2

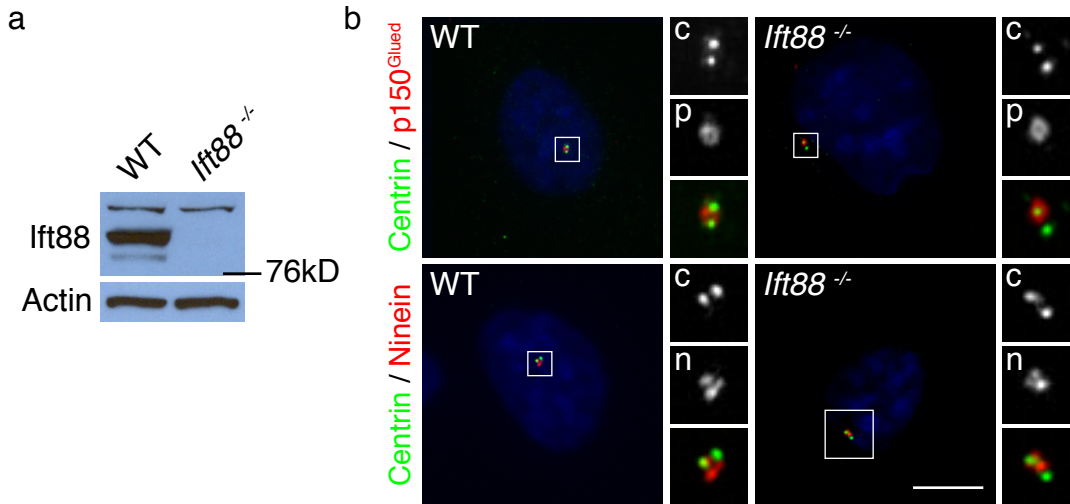

**Supplemental Figure 2: *Ift88* is not required for subdistal appendage organization.** a) Total cell lysates of wild-type (WT) or *Ift88*<sup>-/-</sup> MEFs were analyzed by immunoblotting for *Ift88*. Actin served as a loading control. 40µg of protein lysate was loaded per lane. b) WT and *Ift88*<sup>-/-</sup> cells in G1 were co-stained for Centrin (“c”, green), p150<sup>Glued</sup> (“p”, red) and Ninein (“n”, red) to monitor centriole and subdistal appendage organization, respectively. Scale bars indicate 5µm for all images.

Supplemental Figure 3

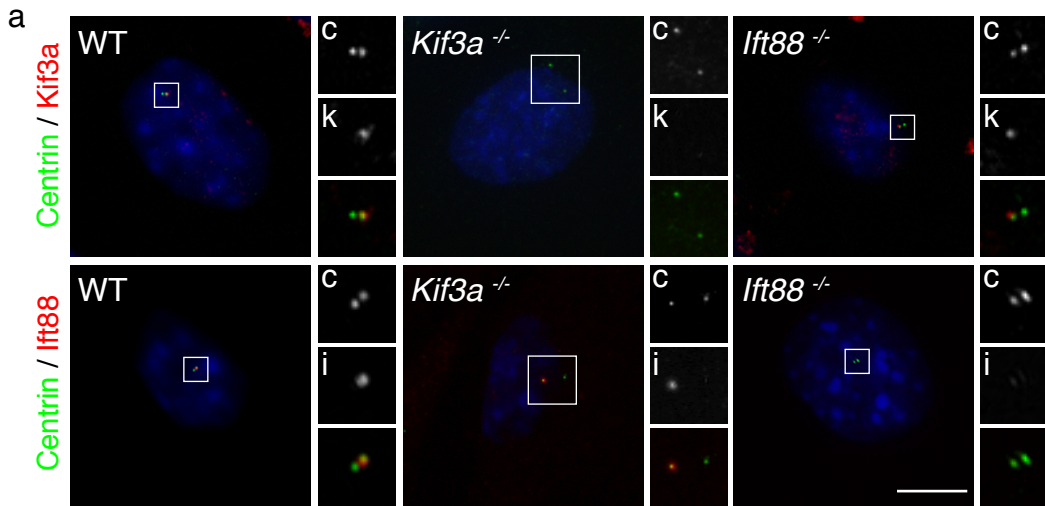

**Supplemental Figure 3: The centriolar localization of Kif3a and Ift88 are independent of the other.** a) WT, *Kif3a*<sup>-/-</sup> and *Ift88*<sup>-/-</sup> MEFs were co-stained for Centrin (“c”, green) and either Kif3a (“k”, red) or Ift88 (“i”, red). Scale bar indicate 5µm for all images.
