# Supplementary material
Source: PubMed Central journal article supplement (PMC3579144)

Figure 4c

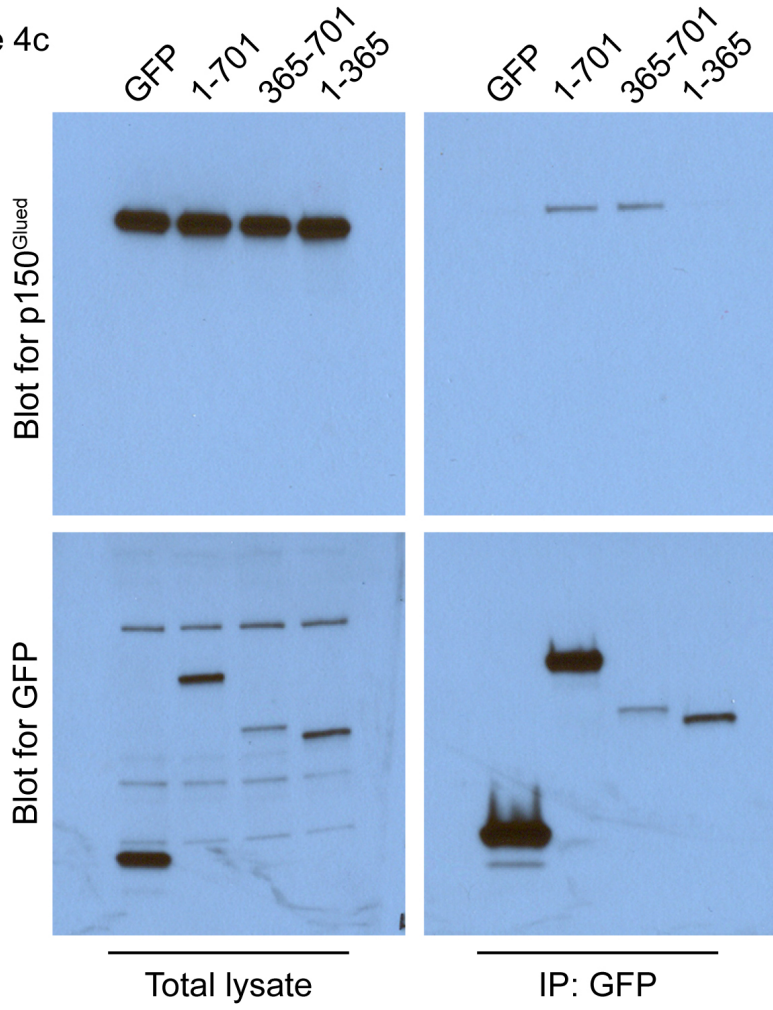

Figure 4h

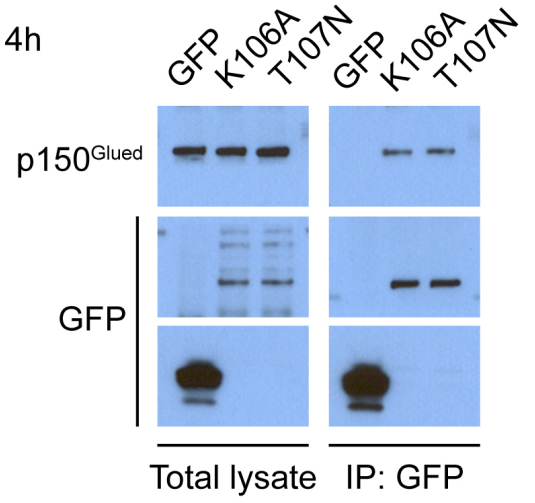

Supplement: emboj20133df4.pdf [file emboj20133df4.pdf]
